# Supplementary material for: Comprehensive Analysis of Rhodomyrtus tomentosa Chloroplast Genome
Source: PubMed Central journal article supplement (PMC6524380; doi:10.3390/plants8040089), 2019-04-04
Supplement: plants-08-00089-s001.pdf [file plants-08-00089-s001.pdf]

**Table 1.** Codon usage of the *Rhodomyrtus tomentosa* chloroplast genome.

| Amino acid | Codon  | Count | RSCU | Amino acid | Codon  | Count | RSCU |
|------------|--------|-------|------|------------|--------|-------|------|
| Phe        | UUU(F) | 966   | 1.29 | Tyr        | UAU(Y) | 725   | 1.57 |
| Phe        | UUC(F) | 529   | 0.71 | Tyr        | UAC(Y) | 201   | 0.43 |
| Leu        | UUA(L) | 859   | 1.89 | Stop       | UAA(*) | 72    | 1.30 |
| Leu        | UUG(L) | 549   | 1.21 | Stop       | UAG(*) | 56    | 1.01 |
| Leu        | CUU(L) | 568   | 1.25 | His        | CAU(H) | 459   | 1.53 |
| Leu        | CUC(L) | 200   | 0.44 | His        | CAC(H) | 141   | 0.47 |
| Leu        | CUA(L) | 370   | 0.81 | Gln        | CAA(Q) | 689   | 1.54 |
| Leu        | CUG(L) | 178   | 0.39 | Gln        | CAG(Q) | 205   | 0.46 |
| Ile        | AUU(I) | 1,046 | 1.44 | Asn        | AAU(N) | 927   | 1.52 |
| Ile        | AUC(I) | 445   | 0.61 | Asn        | AAC(N) | 294   | 0.48 |
| Ile        | AUA(I) | 687   | 0.95 | Lys        | AAA(K) | 995   | 1.46 |
| Met        | AUG(M) | 613   | 1.00 | Lys        | AAG(K) | 369   | 0.54 |
| Val        | GUU(V) | 470   | 1.38 | Asp        | GAU(D) | 821   | 1.60 |
| Val        | GUC(V) | 174   | 0.51 | Asp        | GAC(D) | 204   | 0.40 |
| Val        | GUA(V) | 512   | 1.51 | Glu        | GAA(E) | 999   | 1.47 |
| Val        | GUG(V) | 203   | 0.60 | Glu        | GAG(E) | 363   | 0.53 |
| Ser        | UCU(S) | 556   | 1.71 | Cys        | UGU(C) | 202   | 1.41 |
| Ser        | UCC(S) | 308   | 0.95 | Cys        | UGC(C) | 84    | 0.59 |
| Ser        | UCA(S) | 377   | 1.16 | Stop       | UGA(*) | 38    | 0.69 |
| Ser        | UCG(S) | 204   | 0.63 | Trp        | UGG(W) | 460   | 1.00 |
| Pro        | CCU(P) | 396   | 1.52 | Arg        | CGU(R) | 327   | 1.29 |
| Pro        | CCC(P) | 201   | 0.77 | Arg        | CGC(R) | 83    | 0.33 |
| Pro        | CCA(P) | 311   | 1.20 | Arg        | CGA(R) | 351   | 1.39 |
| Pro        | CCG(P) | 132   | 0.51 | Arg        | CGG(R) | 105   | 0.41 |
| Thr        | ACU(T) | 510   | 1.60 | Ser        | AGU(S) | 389   | 1.20 |
| Thr        | ACC(T) | 231   | 0.73 | Ser        | AGC(S) | 113   | 0.35 |
| Thr        | ACA(T) | 394   | 1.24 | Arg        | AGA(R) | 456   | 1.80 |
| Thr        | ACG(T) | 138   | 0.43 | Arg        | AGG(R) | 198   | 0.78 |
| Ala        | GCU(A) | 571   | 1.79 | Gly        | GGU(G) | 548   | 1.34 |
| Ala        | GCC(A) | 210   | 0.66 | Gly        | GGC(G) | 157   | 0.38 |
| Ala        | GCA(A) | 359   | 1.12 | Gly        | GGA(G) | 655   | 1.60 |
| Ala        | GCG(A) | 137   | 0.43 | Gly        | GGG(G) | 281   | 0.68 |

RSCU: Relative Synonymous Codon Usage.

**Table S2.** Predicted RNA editing sites in the chloroplast genomes of *Rhodomyrtus tomentosa* by the PREP program

| Gene        | Nucleotide position | Codon change | Amino acid change | Score |
|-------------|---------------------|--------------|-------------------|-------|
| <i>accD</i> | 715                 | CTT-TTT      | L-F               | 1.00  |
|             | 794                 | TCG-TTG      | S-L               | 0.80  |
|             | 1,403               | CCT-CTT      | P-L               | 1.00  |
| <i>atpI</i> | 23                  | ACC-ATC      | T-I               | 1.00  |
| <i>ccsA</i> | 89                  | TCA-TTA      | S-L               | 1.00  |
| <i>matK</i> | 601                 | CAT-TAT      | H-Y               | 1.00  |
|             | 1,138               | CGG-TGG      | R-W               | 1.00  |
|             | 1,148               | TCA-TTA      | S-L               | 0.86  |
| <i>ndhA</i> | 1,207               | CAC-TAC      | H-Y               | 1.00  |
|             | 83                  | CCT-CTT      | P-L               | 0.80  |
|             | 313                 | CCT-TCT      | P-S               | 1.00  |
| <i>ndhB</i> | 515                 | ACT-ATT      | T-I               | 1.00  |
|             | 554                 | ACA-ATA      | T-I               | 1.00  |
|             | 634                 | CCT-TCT      | P-S               | 1.00  |
|             | 746                 | CCT-CTT      | P-L               | 1.00  |
|             | 809                 | CCA-CTA      | P-L               | 1.00  |
|             | 995                 | TCA-TTA      | S-L               | 1.00  |
|             | 1,061               | CCA-CTA      | P-L               | 1.00  |
|             | 1,082               | TCA-TTA      | S-L               | 1.00  |
|             | 784                 | CTC-TTC      | L-F               | 1.00  |
|             | 905                 | TCA-TTA      | S-L               | 1.00  |
| <i>ndhD</i> | 1,223               | CCA-CTA      | P-L               | 1.00  |
|             | 1,342               | CAT-TAT      | H-Y               | 1.00  |
|             | 1,367               | TCA-TTA      | S-L               | 0.80  |
|             | 1,502               | TCT-TTT      | S-F               | 1.00  |
|             | 2                   | ACG-ATG      | T-M               | 1.00  |
| <i>ndhF</i> | 313                 | CGG-TGG      | R-W               | 0.80  |
|             | 383                 | TCA-TTA      | S-L               | 1.00  |
|             | 1,405               | CTT-TTT      | L-F               | 0.80  |
| <i>ndhG</i> | 160                 | CTT-TTT      | L-F               | 1.00  |
|             | 259                 | CAC-TAC      | H-Y               | 1.00  |
|             | 586                 | CTT-TTT      | L-F               | 0.80  |
|             | 1,420               | CAT-TAT      | H-Y               | 1.00  |
|             | 2,231               | TCC-TTC      | S-F               | 1.00  |
| <i>psaI</i> | 166                 | CAT-TAT      | H-Y               | 0.80  |
|             | 314                 | ACA-ATA      | T-I               | 0.80  |
| <i>psbE</i> | 83                  | TCT-TTT      | S-F               | 0.86  |
| <i>psbF</i> | 214                 | CCT-TCT      | P-S               | 1.00  |
| <i>psbF</i> | 77                  | TCT-TTT      | S-F               | 1.00  |
